# Supplementary material for: miR‐155‐regulated mTOR and Toll‐like receptor 5 in gastric diffuse large B‐cell lymphoma
Source: PubMed Central journal article supplement (PMC8817081; doi:10.1002/cam4.4466), 2021-12-16
Supplement: CAM4-11-555-s001.pdf [file CAM4-11-555-s001.pdf]

**Figure S1: Ten of 16 gastric diffuse large B-cell lymphomas could not be classified into the GCB or ABC subtypes**

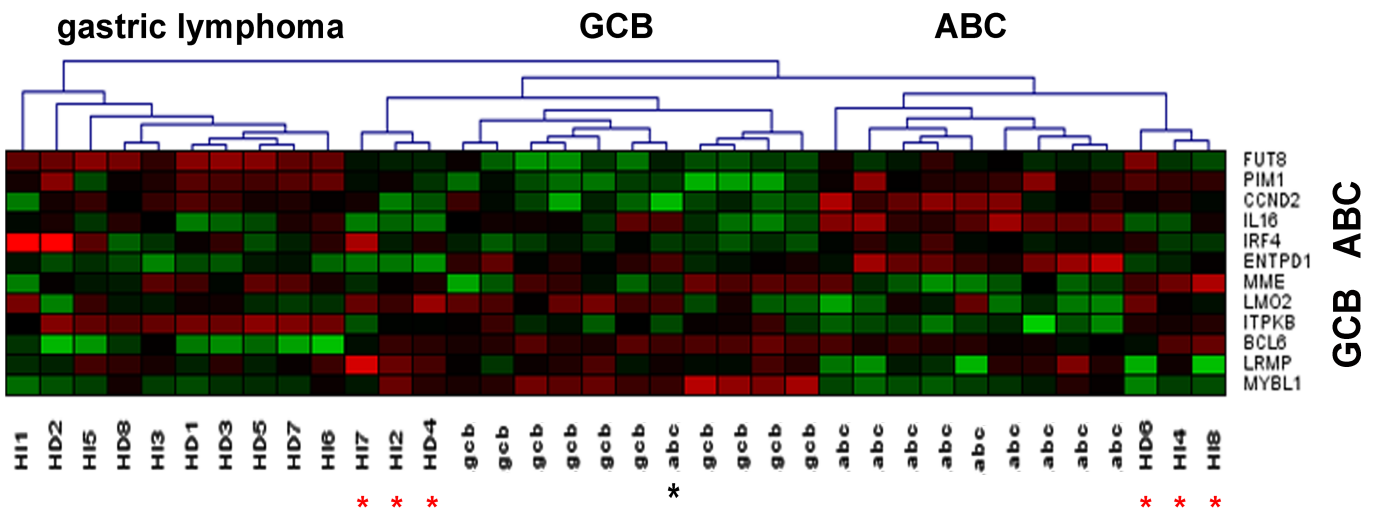

Clustering of our gastric DLBCLs into GCB and ABC types, using as controls, NCBI GEO GSE56315. The classification was based on 6 ABC markers (FUT8, PIM1, CCND2, IL16, IRF4 or Mum1, ENTPD1) and 6 GCB markers (MME or CD10, LMO2, ITPKB, BCL6, LRMP, MYBL1), including the 3 markers, BCL6, Mum1, and CD10, of the Hans system.

For the controls, 10 GCB DLBCLs and 9 of 10 ABC DLBCLs were correctly classified, except one indicated by the black asterisk.

Out of 8 sensitive (HD) and 8 resistant (HI) gastric DLBCLs, most cases could not be appropriately classified, only 3 cases as the GCB type and 3 cases as the ABC type, as indicated by red asterisks.

In fact, the 10 unclassified gastric DLBCLs had a distinctive signature. For example, they had strong expression of the ABC markers FUT8 and PIM1, and the GCB marker ITPKB. The co-expression of ABC and GCB markers, or mix-up of the AGC and GCB markers, is an intrinsic signature, not a statistical artifact, and is distinct for gastric DLBCL, not found in nodal DLBCL.
